# Supplementary material for: Separation of phenol from model oils with quaternary ammonium saltsvia forming deep eutectic solvents
Source: Royal Society of Chemistry journal article supplement (doi:10.1039/c2gc36602a), 2012-11-08
Supplement: c2gc36602a.pdf [file c2gc36602a.pdf]

## Electronic supplementary information

### Separation of phenols from model oils with quaternary ammonium salts *via* forming deep eutectic solvents

Wujie Guo<sup>a</sup>, Yucui Hou<sup>b</sup>, Weize Wu,<sup>\*a</sup> Shuhang Ren<sup>a</sup>, Shidong Tian<sup>a</sup> and Kenneth N. Marsh<sup>\*c</sup>

<sup>a</sup> *State Key Laboratory of Chemical Resource Engineering, Beijing University of Chemical Technology, Beijing 100029, China. Fax/ Tel: 86 10 64427603; E-mail: wzwu@mail.buct.edu.cn*

<sup>b</sup> *Department of Chemistry, Taiyuan Normal University, Taiyuan 030031, China*

<sup>c</sup> *Centre for Energy, School of Mechanical and Chemical Engineering, The University of Western Australia, Crawley WA 6009, Australia. Email: ken.marsh@uwa.edu.au*

#### Content:

**Fig. S1** The phenol-removal efficiency at different mole ratios of TEAC to phenol (initial phenol contents, 200.6 g/L; temperature, 303.2 K; extraction time, 30 min).

**Fig. S2** The phenol-removal efficiency versus extraction time (initial phenol contents, 200.6 g/L; temperature, 303.2 K; mole ratio of TEAC to phenol, 0.8).

**Fig. S3** The phenol-removal efficiency versus extraction temperature (initial phenol contents, 200.6 g/L; mole ratio of TEAC to phenol, 0.8; extraction time, 30min).

**Fig. S4** FT-IR spectra of (A) fresh TMAC, (B) regenerated TMAC.

**Fig. S5** <sup>1</sup>H NMR spectra (600 MHz, rt, D<sub>2</sub>O) of (A) fresh TMAC, (B) regenerated TMAC.

**Fig. S6** The phenol-removal efficiency versus regeneration cycle (initial phenol contents, 200.6 g/L; temperature, 303.2 K; mole ratio of TEAC to phenol, 1; extraction time, 30 min).

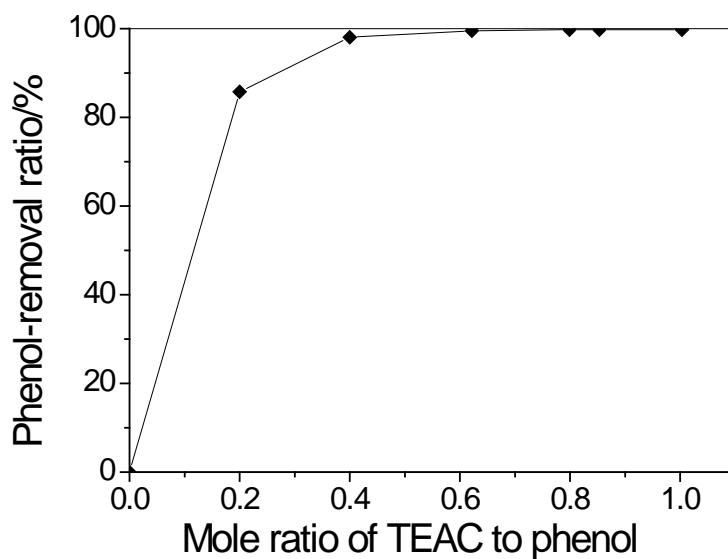

**Fig. S1** The phenol-removal efficiency at different mole ratios of TEAC to phenol (initial phenol contents, 200.6 g/L; temperature, 303.2 K; extraction time, 30 min).

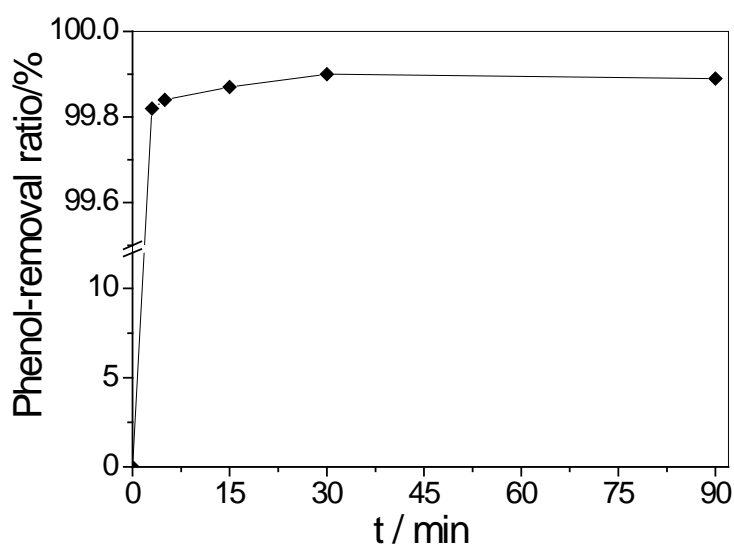

**Fig. S2** The phenol-removal efficiency versus extraction time (initial phenol content, 200.6 g/L; temperature, 303.2 K; mole ratio of TEAC to phenol, 0.8).

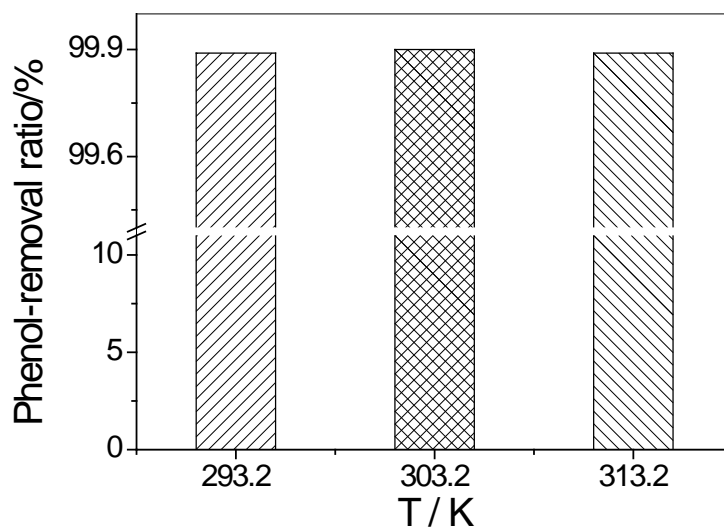

**Fig. S3** The phenol-removal efficiency versus extraction temperature (initial phenol contents, 200.6 g/L; mole ratio of TEAC to phenol, 0.8; extraction time, 30min).

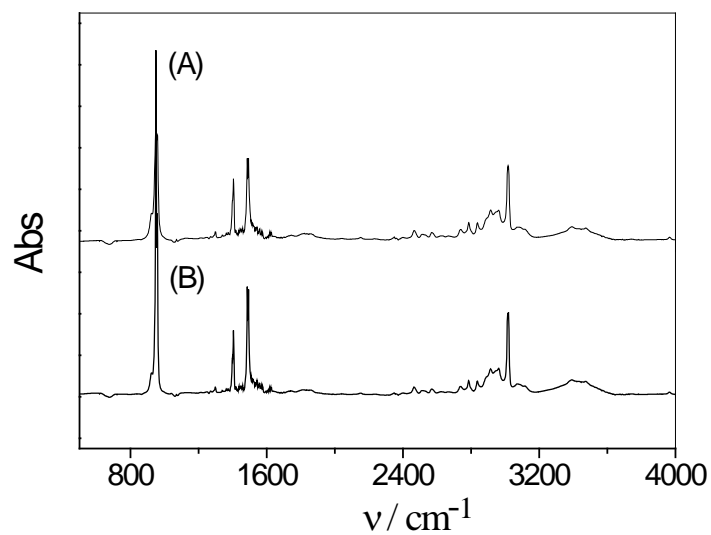

**Fig. S4** FT-IR spectra of (A) fresh TMAC, (B) regenerated TMAC.

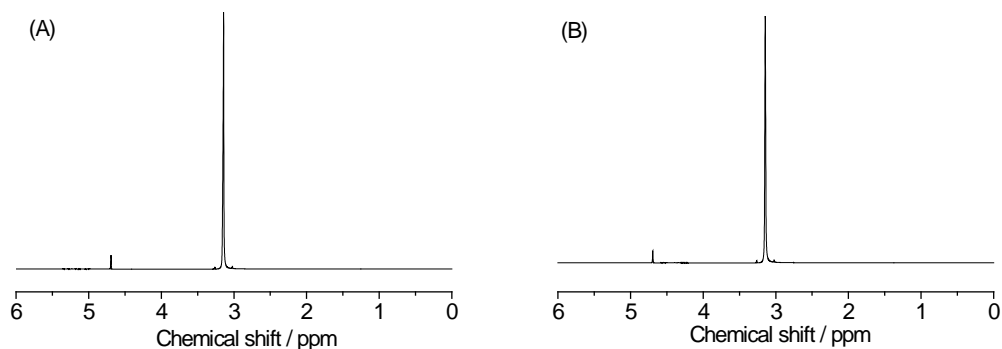

**Fig. S5**  $^1\text{H}$  NMR spectra (600 MHz, rt,  $\text{D}_2\text{O}$ ) of (A) fresh TMAC, (B) regenerated TMAC.

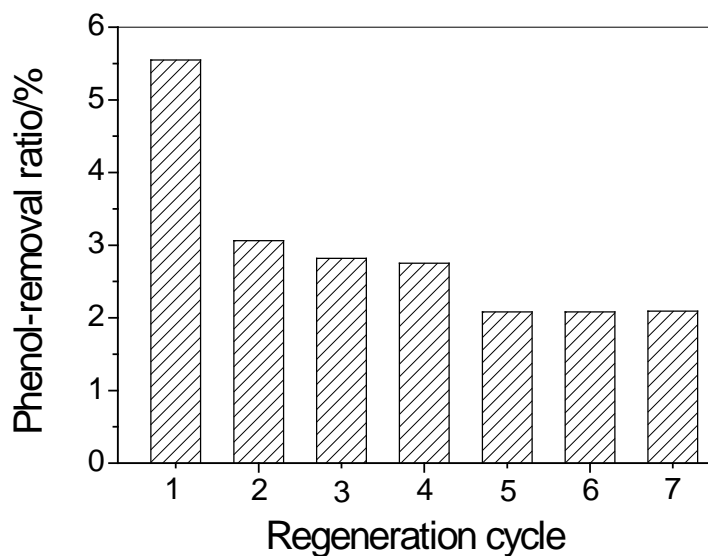

**Fig. S6** The phenol-removal efficiency versus regeneration cycle (initial phenol contents, 200.6 g/L; temperature, 303.2 K; mole ratio of TEAC to phenol, 1; extraction time, 30 min).
